# Supplementary material
Source: HighWire-hosted journal article supplement (https://erj.ersjournals.com/content/58/4/2101714)
Supplement: inline-supplementary-material-1 [file inline-supplementary-material-1.pdf]

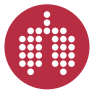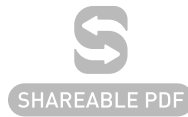

# Air pollution and poverty: a deadly combination in idiopathic pulmonary fibrosis?

Lucile Sesé<sup>1,2,3</sup>, Isabella Annesi-Maesano <sup>4</sup>, Catherine Cavalin <sup>5,6,7</sup> and Hilario Nunes<sup>2</sup>

<sup>1</sup>AP-HP, Service de Physiologie, Hôpital Avicenne - Université Sorbonne Paris Nord, INSERM 1272, «Hypoxie et Poumon: pneumopathies fibrosantes, modulations ventilatoires et circulatoires», Bobigny, France. <sup>2</sup>Centre de référence des maladies pulmonaires rares (site constitutif), AP-HP, Service de Pneumologie, Hôpital Avicenne - Université Sorbonne Paris Nord, INSERM 1272, «Hypoxie et Poumon: pneumopathies fibrosantes, modulations ventilatoires et circulatoires», Bobigny, France. <sup>3</sup>EPAR, IPLESP UMR-S 1136, INSERM et Sorbonne Université, Paris, France. <sup>4</sup>INSERM and Montpellier University, Institute Desbrest of Epidemiology and Public Health, IDESP, Montpellier, France. <sup>5</sup>Institut de recherche interdisciplinaire en sciences sociales (IRISSO, UMR CNRS-INRA 7170-1427), Paris-Dauphine Université, PSL - Paris, Paris, France. <sup>6</sup>Laboratoire interdisciplinaire d'évaluation des politiques publiques de Sciences Po (LIEPP), Sciences Po, Paris, France. <sup>7</sup>Centre d'études de l'emploi et du travail (CEET, CNAM), Noisy-le-Grand, France.

Corresponding author: Lucile Sesé ([lucile.sese@aphp.fr](mailto:lucile.sese@aphp.fr))

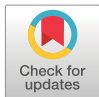

Shareable abstract (@ERSpublications)

**Socioeconomic level influences co-exposure throughout life, and by the time IPF appears, social conditions and environmental exposures have already been at work for many years**

<https://bit.ly/3iAmS8R>

**Cite this article as:** Sesé L, Annesi-Maesano I, Cavalin C, *et al.* Air pollution and poverty: a deadly combination in idiopathic pulmonary fibrosis?. *Eur Respir J* 2021; 58: 2101714 [DOI: 10.1183/13993003.01714-2021].

This single-page version can be shared freely online.

Copyright ©The authors 2021. For reproduction rights and permissions contact [permissions@ersnet.org](mailto:permissions@ersnet.org)

Received: 17 June 2021  
Accepted: 04 Aug 2021

*To the Editor:*

Disparities in respiratory health can be partly explained by environmental exposure (in particular to air pollution) and socioeconomic inequalities [1]. Although idiopathic pulmonary fibrosis (IPF) is a rare disease, there has been growing interest over the last years in the role of air pollution in its incidence and natural history.
